# Supplementary material
Source: PubMed Central journal article supplement (PMC1735636)

Figure B : Cap analogue experiment

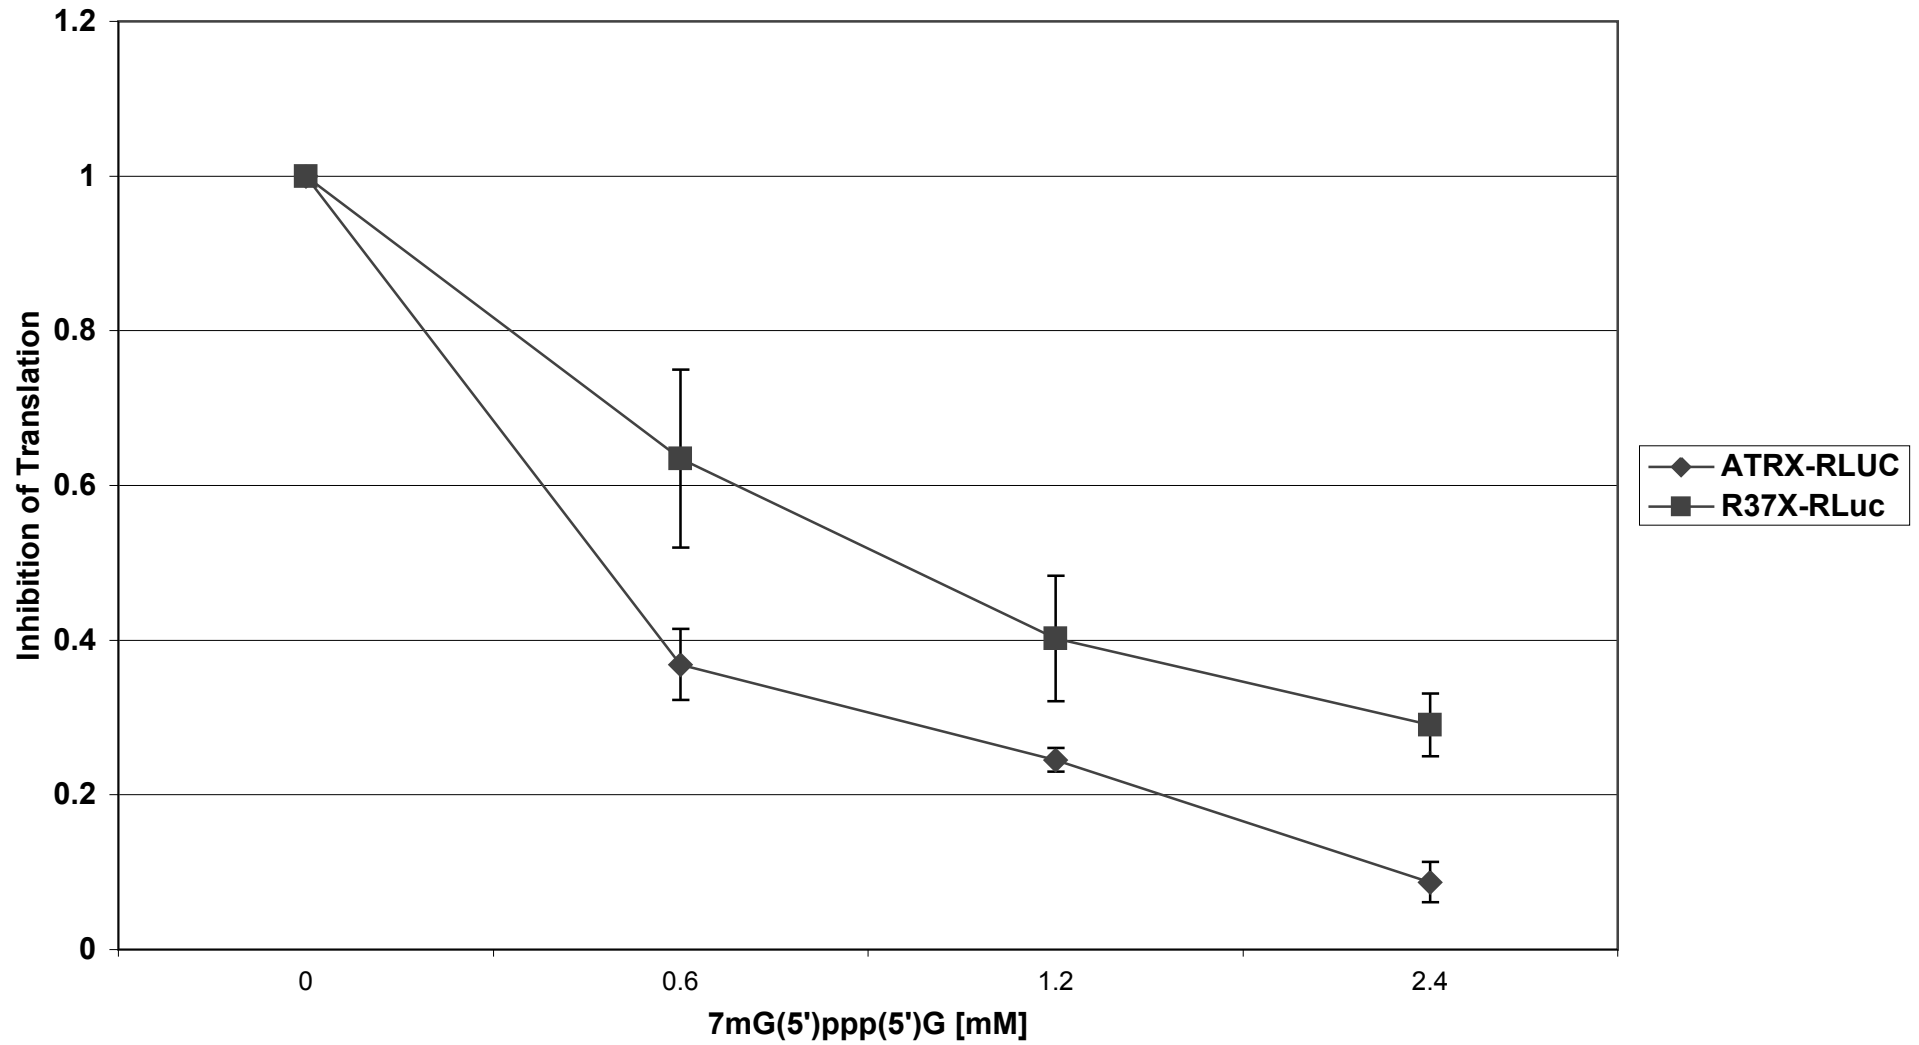

Supplement: jmedgene_41_12_951__1.pdf [file jmedgene_41_12_951__1.pdf]

Figure C : Dual Cistron Expt.

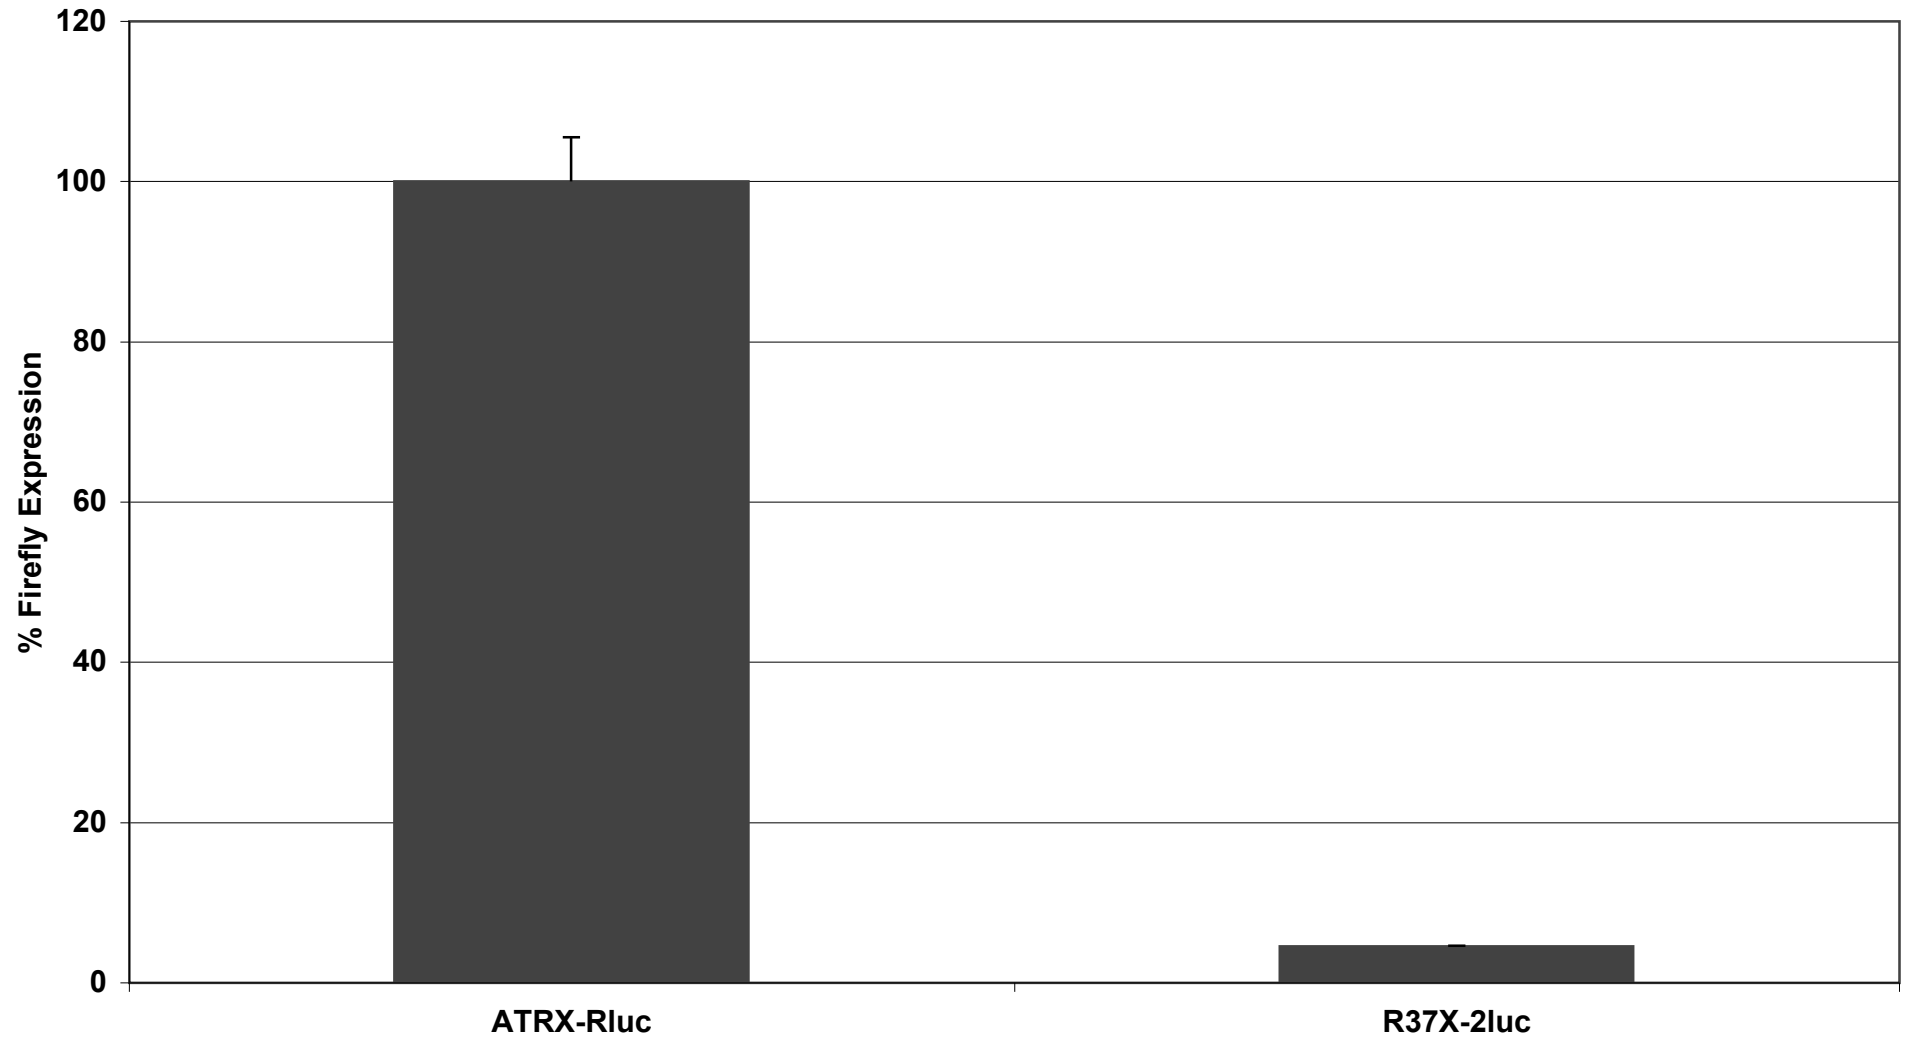

Supplement: jmedgene_41_12_951__2.pdf [file jmedgene_41_12_951__2.pdf]
